# Supplementary material for: Genome-Wide Profiling of PARP1 Reveals an Interplay with Gene Regulatory Regions and DNA Methylation
Source: PubMed Central journal article supplement (PMC4549251; doi:10.1371/journal.pone.0135410), 2015-08-25
Supplement: pone.0135410.s001.pdf [file pone.0135410.s001.pdf]

**Figure S1****A.**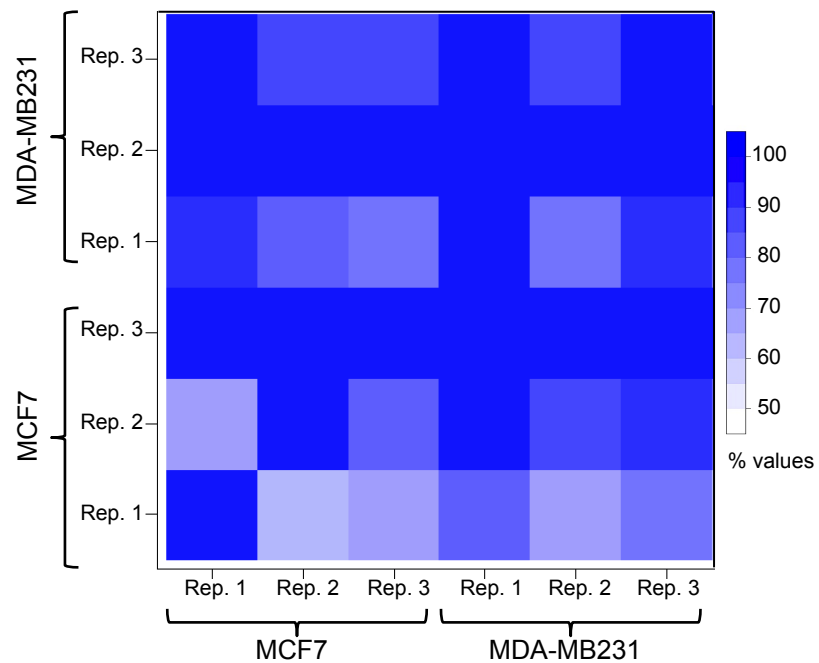**B.**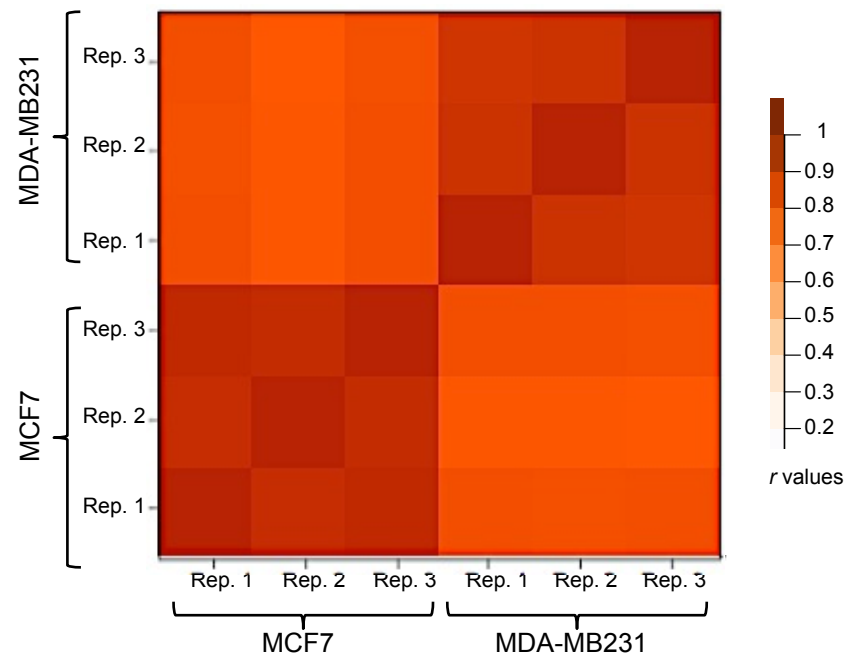**C.**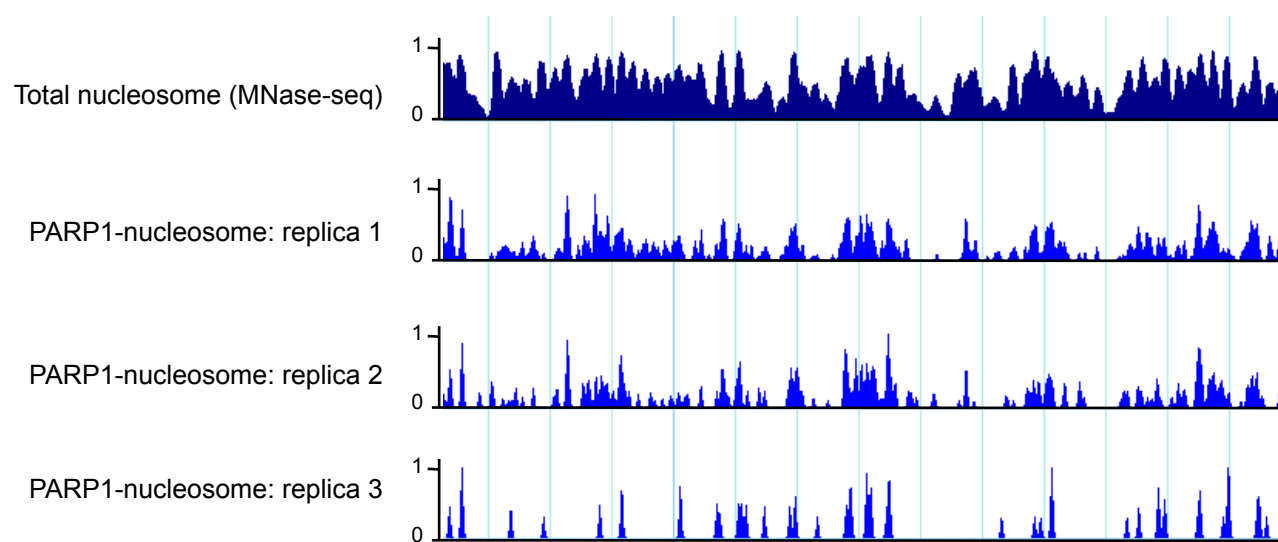

Figure S1: Reproducibility of PARP1-nuc-ChIP-seq data: Using both methods of PARP1 peak calling methods showed high reproducibility with each replicate. A) Peak detection was performed by running model-based analysis of ChIPSeq (MACS) bandwidth of 200 bp, and a *P*-value threshold of  $1 \times 10^{-5}$ . B) Aligning PARP1-nucleosome reads and mapping the centers of these nucleosomes showed reproducibility with each replicate. C) Wig plots imported into the UCSC browser show reproducibility of the peaks.
