# Supplementary material for: Genome-Wide Profiling of PARP1 Reveals an Interplay with Gene Regulatory Regions and DNA Methylation
Source: PubMed Central journal article supplement (PMC4549251; doi:10.1371/journal.pone.0135410), 2015-08-25
Supplement: pone.0135410.s003.pdf [file pone.0135410.s003.pdf]

**Figure S3**

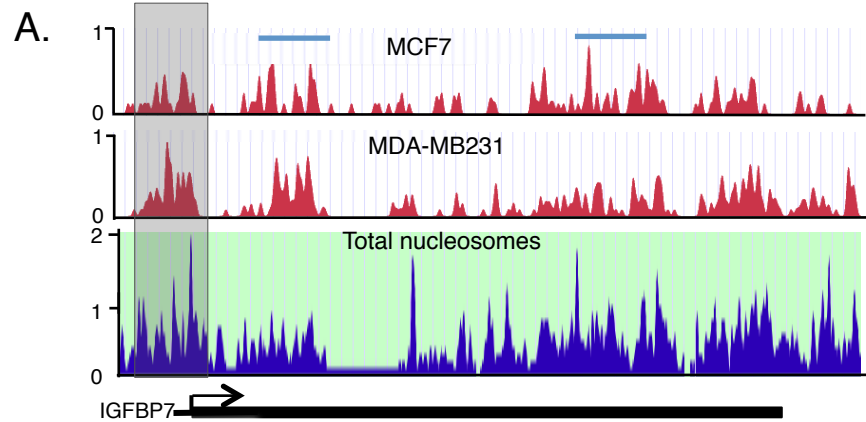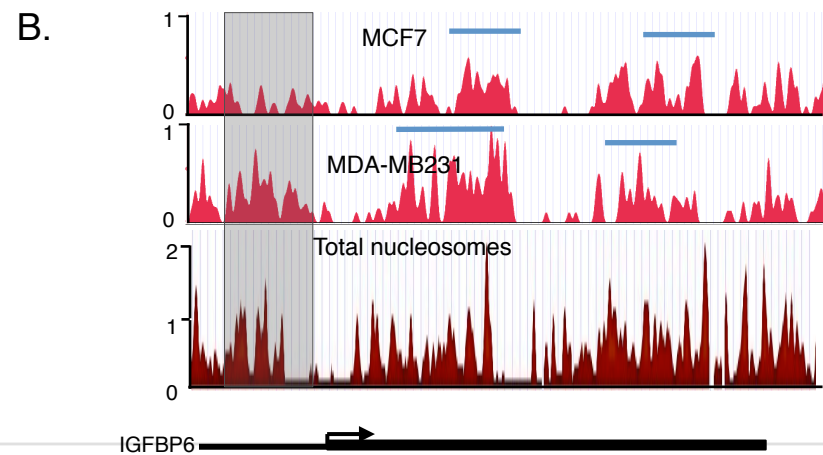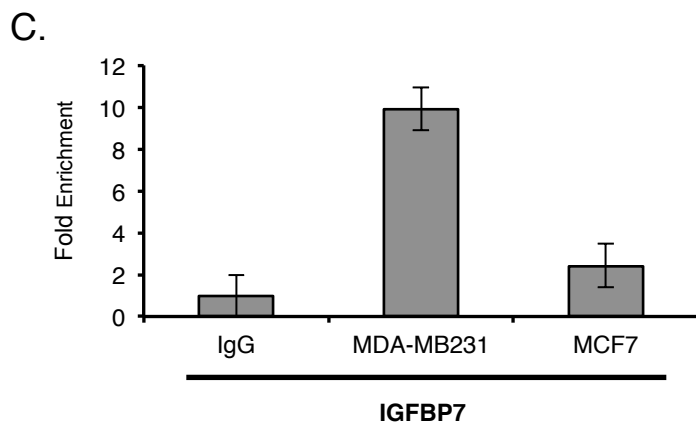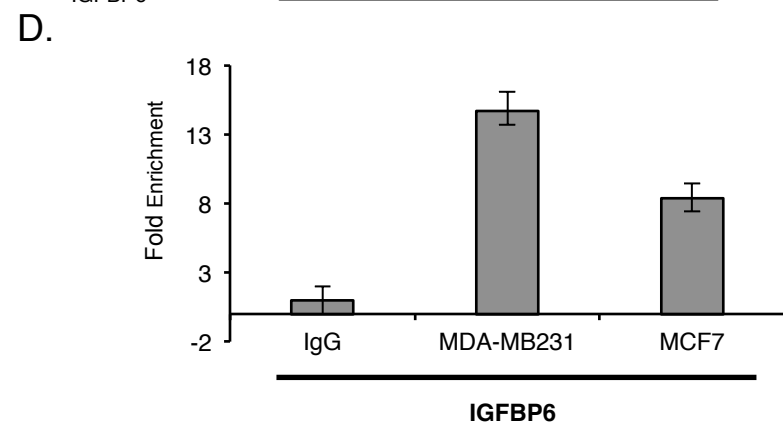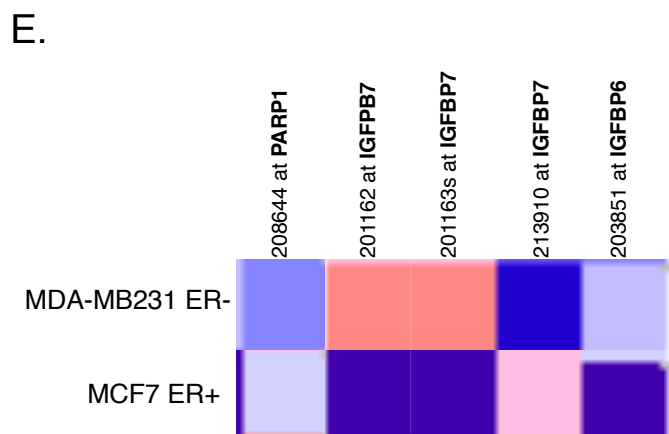

**Figure S3:** PARP1 binding at specific promoters correlate with active gene transcription. We created wiggle files from the PARP1 nuc-ChIP-seq signals and aligned them to the human genome using UCSC genome browser (hg19). PARP1 binding sites in A) MCF7 and MDA-MB231 in IGFBP7 and B) IGFBP6 promoters and gene bodies respectively (represented by lines). Measurement of PARP1 occupancy using quantitative real-time PCR at promoters of C) IGFBP7 and D) IGFBP6 respectively. E) Gene expression profile of IGFBP7 and IGFBP6 as shown in MCF7 and MDA-MB231 obtained from the GSEA (Broad Institute). \* Blue bars indicate regions we called based on significance as PARP1-nucleosomes bound.
