# Supplementary material for: Genome-Wide Profiling of PARP1 Reveals an Interplay with Gene Regulatory Regions and DNA Methylation
Source: PubMed Central journal article supplement (PMC4549251; doi:10.1371/journal.pone.0135410), 2015-08-25
Supplement: pone.0135410.s004.pdf [file pone.0135410.s004.pdf]

**Figure S4**

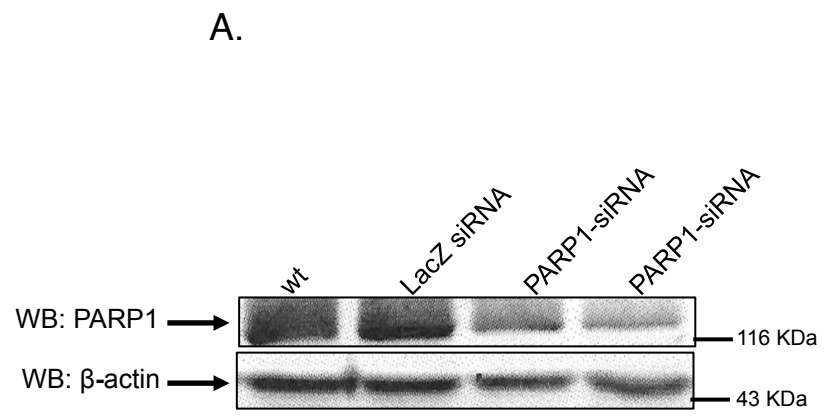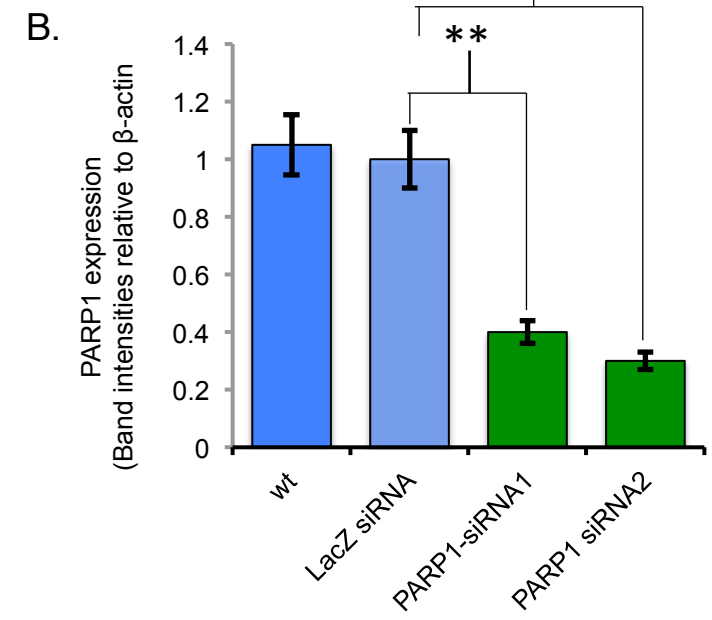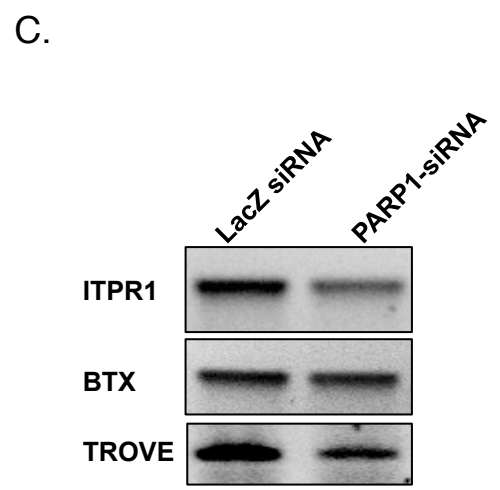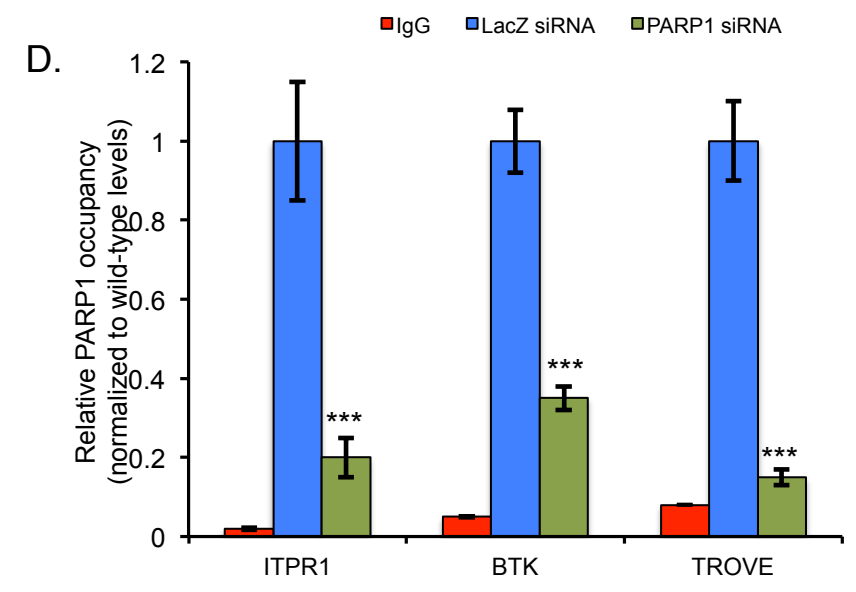

**Figure S4: Evaluation of siRNA transfection efficiency in MCF7 cells.** The effects of two PARP1 siRNAs - PARP1-siRNA1 and PARP1-siRNA2, targeting different regions of PARP1 gene on the levels of PARP1 were analyzed by western blot (transfection was performed at 50 nmol/L PARP1 siRNA (Dharmacon) for 48 h). Unrelated siRNA (LacZ) served as negative control. **A.** Representative western blot analyses **B.** Band intensities were quantified and measured as the percentage over  $\beta$ -actin, normalized to non-treated cells. **C.** Representative agarose gel images stained with Gelstar<sup>®</sup> (inverted) of PCR analyses showing the measurement of PARP1 occupancy at PARP1-target genes after PARP1-knockdown. The occupancy of PARP1 at a previously validated promoter (ITPR1 – ref. 29) was used as positive control **D.** PARP1 occupancy from quantitative real-time PCR analyses at the same PARP1-target genes as in C. Data are expressed as the mean  $\pm$  S.E.M, n = 3. \*\* P < 0.001 compared to the control group by student t-test. (PARP1 occupancy in wild-type cells (treated with LacZ) was normalized to 1 and all other measurements of relative PARP1 occupancy in the various treatments were measured relative to relative PARP1 occupancy in wild-type cells).
