# Supplementary material for: Genome-Wide Profiling of PARP1 Reveals an Interplay with Gene Regulatory Regions and DNA Methylation
Source: PubMed Central journal article supplement (PMC4549251; doi:10.1371/journal.pone.0135410), 2015-08-25
Supplement: pone.0135410.s005.pdf [file pone.0135410.s005.pdf]

**Figure S5**

**A.**

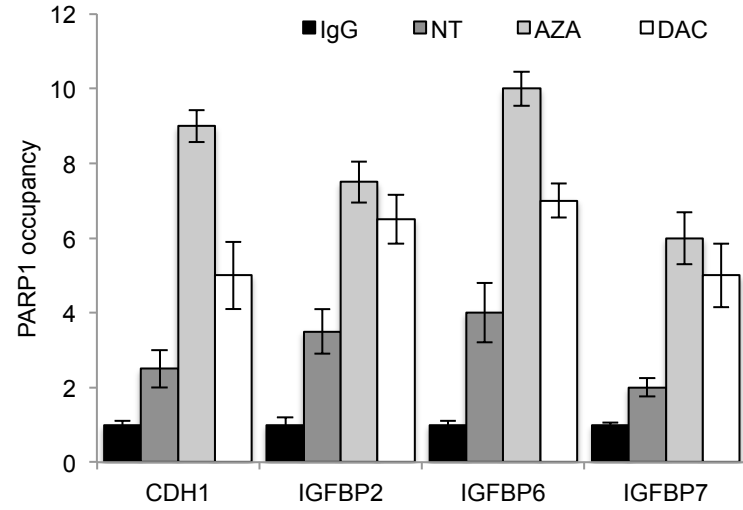

**B.**

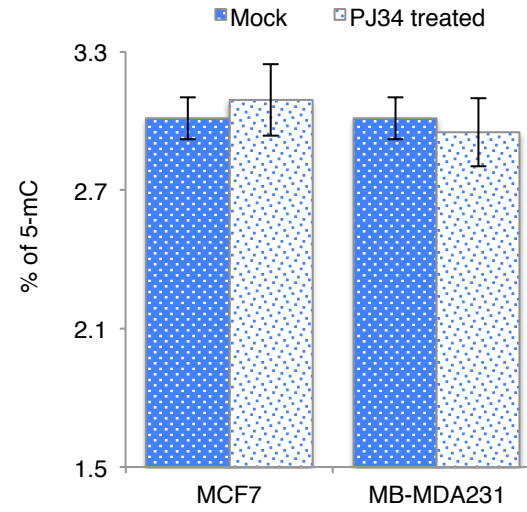

**C.**

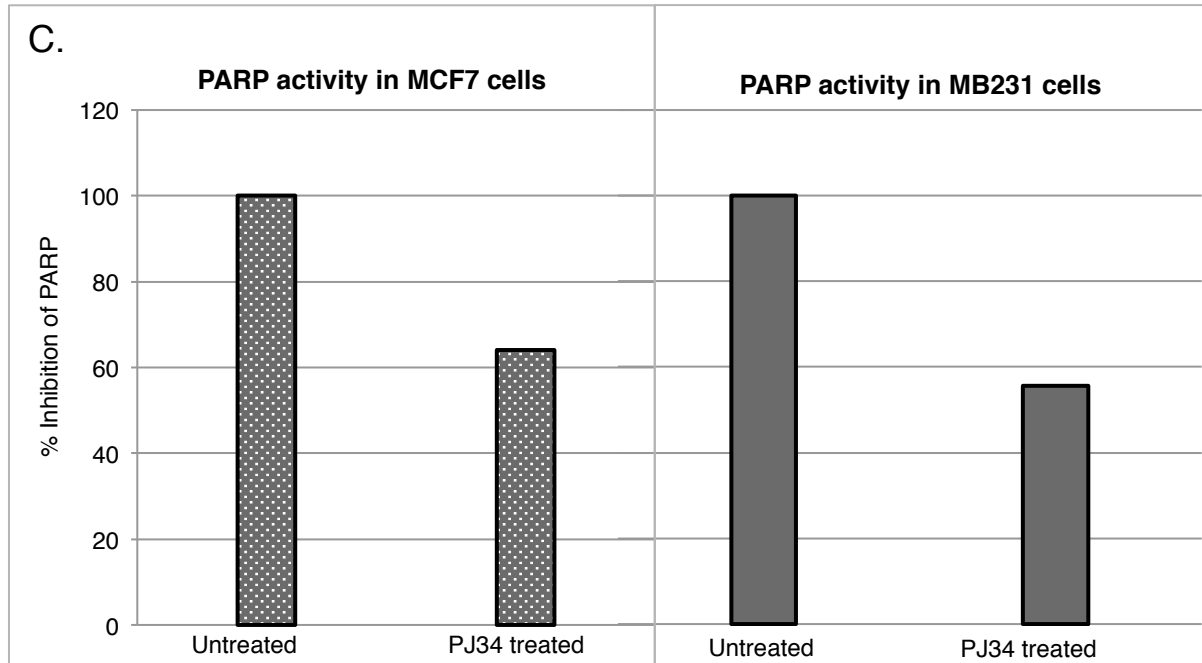

**Figure S5: Measurement of PARP1 occupancy and activity after 5-aza-cytidine, decitabine and PJ34 treatment.** *A)* Measurement of PARP1 occupancy at selected promoters after inhibition of methylation using 5-aza-cytidine. *B)* Treatment of cells with PJ34, did not change the global percentage of 5-methylcytosine levels in MCF7 and MB-MDA231 cells. *C)* Treatment of cells with PJ34, resulted in reduction in PARylation as measured using the Zymo EZ-96DNA Methylation Kit (Catalog #D5004).
