# Supplementary material for: Genome-Wide Profiling of PARP1 Reveals an Interplay with Gene Regulatory Regions and DNA Methylation
Source: PubMed Central journal article supplement (PMC4549251; doi:10.1371/journal.pone.0135410), 2015-08-25
Supplement: pone.0135410.s006.pdf [file pone.0135410.s006.pdf]

Figure S6

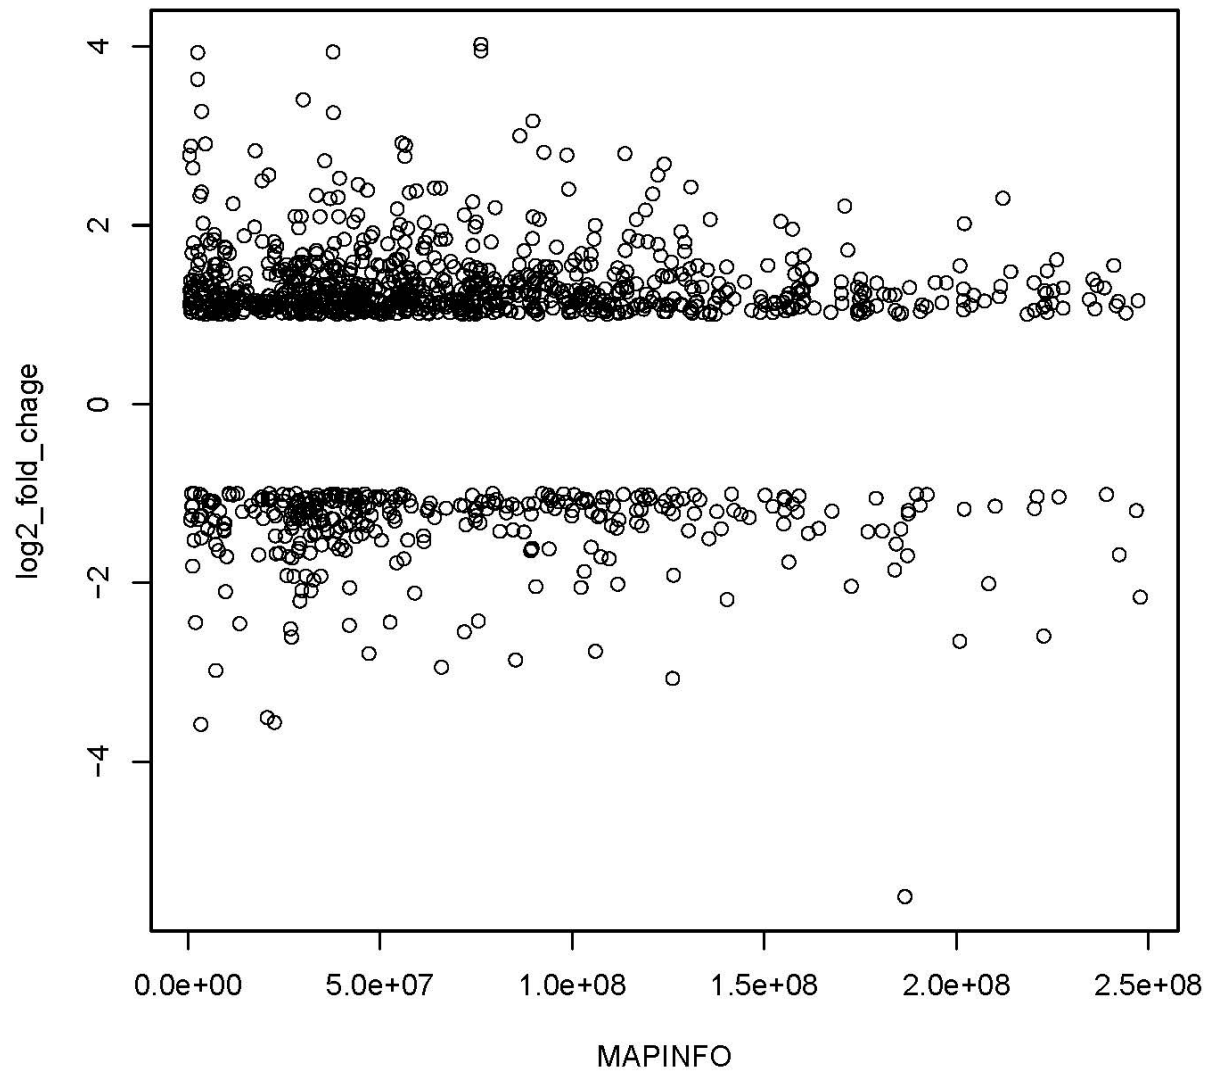

**Figure S6: Differential methylated pattern analyses analyzed from the Infinium microarray analyses.** Scatter plot of  $\log_2(\text{fold\_change})$  of the 1,202 sites illustrating differences in DNA methylation between control and PJ34-treated (PARylation inhibited) cells. A total of 1,202 CpG Sites with  $\text{abs}(\log_2(\text{fold\_change})) > 1$  were observed.
