# Supplementary material for: Genome-Wide Profiling of PARP1 Reveals an Interplay with Gene Regulatory Regions and DNA Methylation
Source: PubMed Central journal article supplement (PMC4549251; doi:10.1371/journal.pone.0135410), 2015-08-25
Supplement: pone.0135410.s007.pdf [file pone.0135410.s007.pdf]

**Figure S7**

**All Hypomethylated sites relation to UCSC refGene Group**

- TSS200 (81)
- TSS1500 (49)
- 1stExon, 5' UTR (16)
- 5' UTR, TSS1500 (7)
- 1stExon, 5' UTR, Body (5)
- 1stExon, TSS1500, 5' UTR (5)
- TSS200, 5' UTR (5)
- 1stExon (3)
- 1stExon, TSS200, 5' UTR, Body (2)
- 3' UTR, TSS1500, 5' UTR, 1stExon (1)
- TSS1500, 1stExon (1)
- Body (50)
- NA
- Body, TSS1500 (12)
- Body, TSS200 (6)
- 1stExon, 5' UTR, Body, TSS1500 (5)
- 1stExon, TSS200, 5' UTR (5)
- 3' UTR (4)
- 1stExon, TSS200 (2)
- TSS1500, TSS200, 5' UTR (2)
- Body, 5' UTR (1)

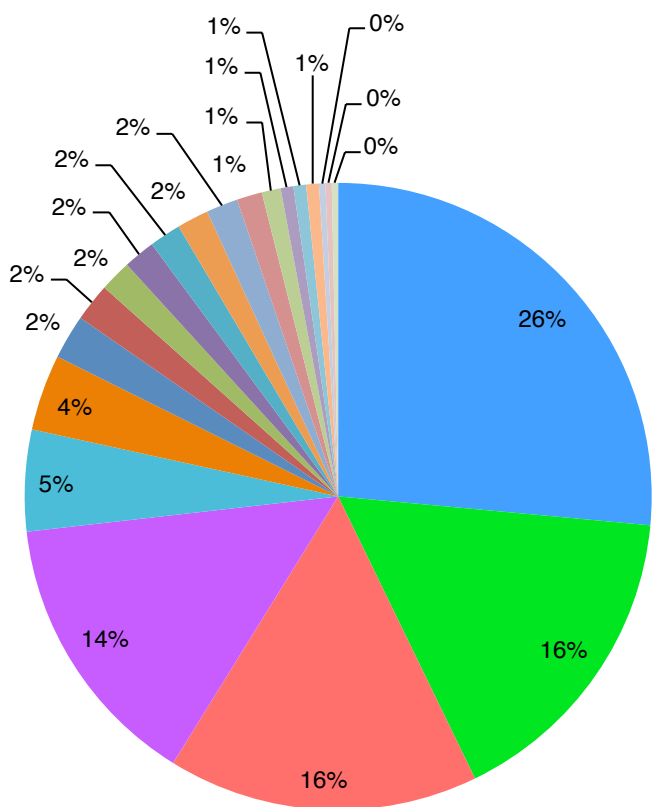

**All Hypermethylated sites relation to UCSC refGene Group**

- TSS200 (229)
- Body (112)
- 1stExon, 5' UTR (53)
- TSS1500, TSS200 (30)
- Body, TSS1500 (17)
- 1stExon, 5' UTR, TSS1500 (16)
- 5' UTR, TSS200 (15)
- 1stExon, 5' UTR, TSS200 (11)
- 5' UTR, Body (5)
- 5' UTR, Body, TSS1500 (2)
- Body, TSS1500, TSS200 (2)
- 1stExon, 5' UTR, Body, TSS200 (1)
- 1stExon, Body, TSS1500 (1)
- 3' UTR, TSS1500 (1)
- 5' UTR, TSS1500, TSS200 (1)
- TSS1500 (154)
- NA (106)
- 5' UTR (34)
- 5' UTR, TSS1500 (20)
- Body, TSS200 (17)
- 1stExon (16)
- 3' UTR (12)
- 1stExon, 5' UTR, Body (6)
- 1stExon, TSS1500 (3)
- 5' UTR, Body, TSS200 (2)
- 1stExon, 3' UTR (1)
- 1stExon, Body (1)
- 1stExon, TSS200 (1)
- 5' UTR, Body, TSS1500, TSS200 (1)

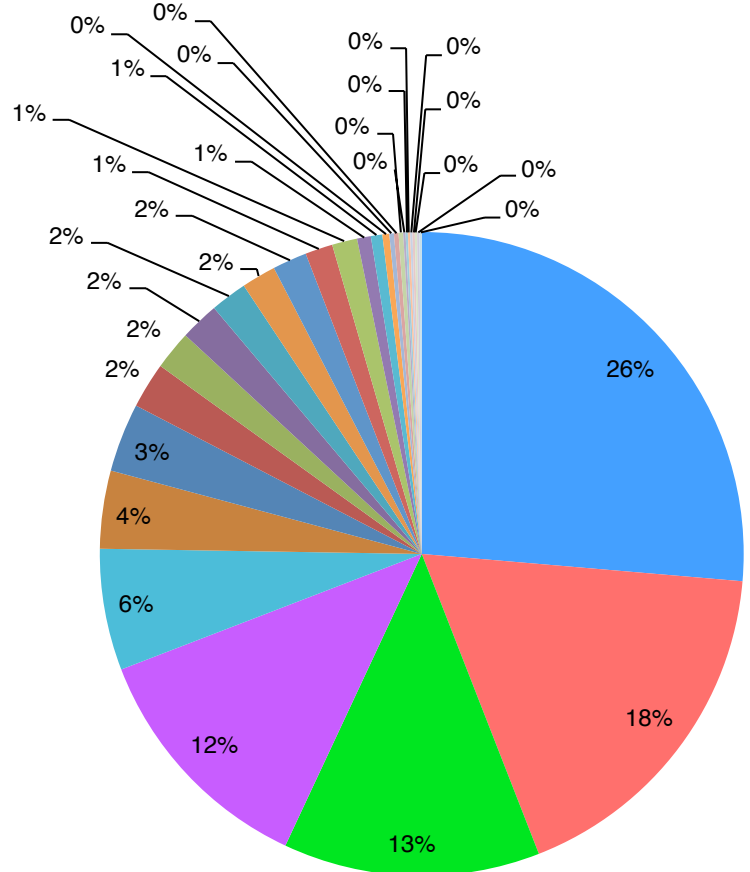

**Figure S7: PARylation mediated methylation patterns in MCF7 cells.** Genomic distribution of hypomethylated and hypermethylated according to gene regulatory regions after inhibition of PARylation.
