# Supplementary material for: Genome-Wide Profiling of PARP1 Reveals an Interplay with Gene Regulatory Regions and DNA Methylation
Source: PubMed Central journal article supplement (PMC4549251; doi:10.1371/journal.pone.0135410), 2015-08-25
Supplement: pone.0135410.s008.pdf [file pone.0135410.s008.pdf]

Figure S8

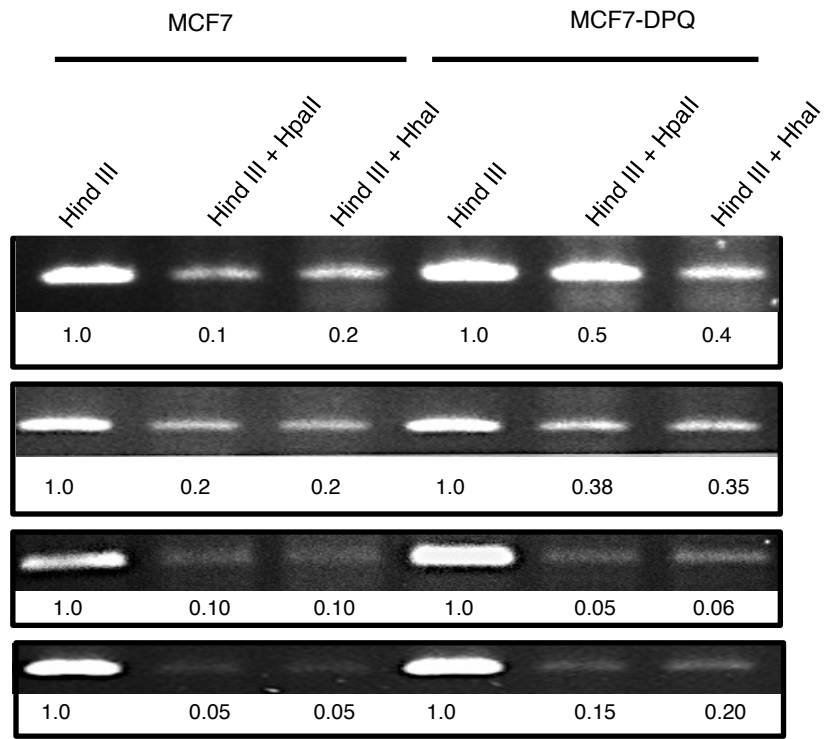

**Figure S8: MSRPE PCR on DPQ treated DNA.** Results from PARP1 target genes shown in Fig. 7 were also validated using a second PARP1-inhibitor (DPQ).
