# Supplementary material for: Genome-Wide Profiling of PARP1 Reveals an Interplay with Gene Regulatory Regions and DNA Methylation
Source: PubMed Central journal article supplement (PMC4549251; doi:10.1371/journal.pone.0135410), 2015-08-25
Supplement: pone.0135410.s009.pdf [file pone.0135410.s009.pdf]

**Figure S9**

**A.**

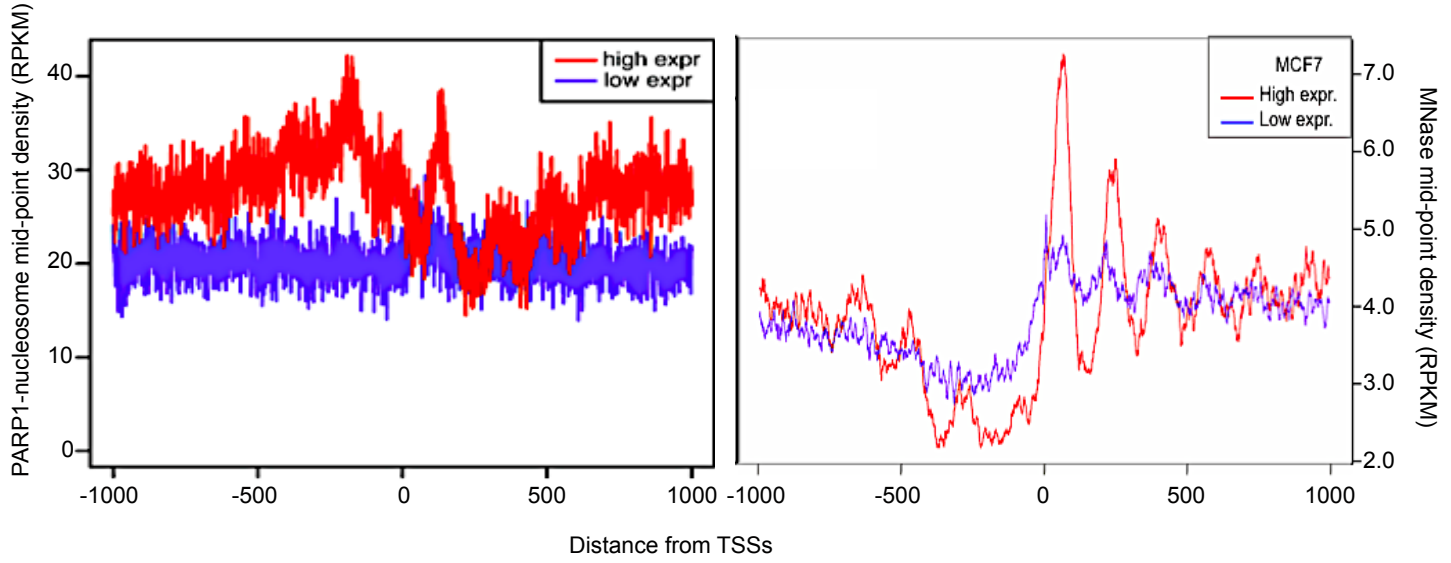

**B.**

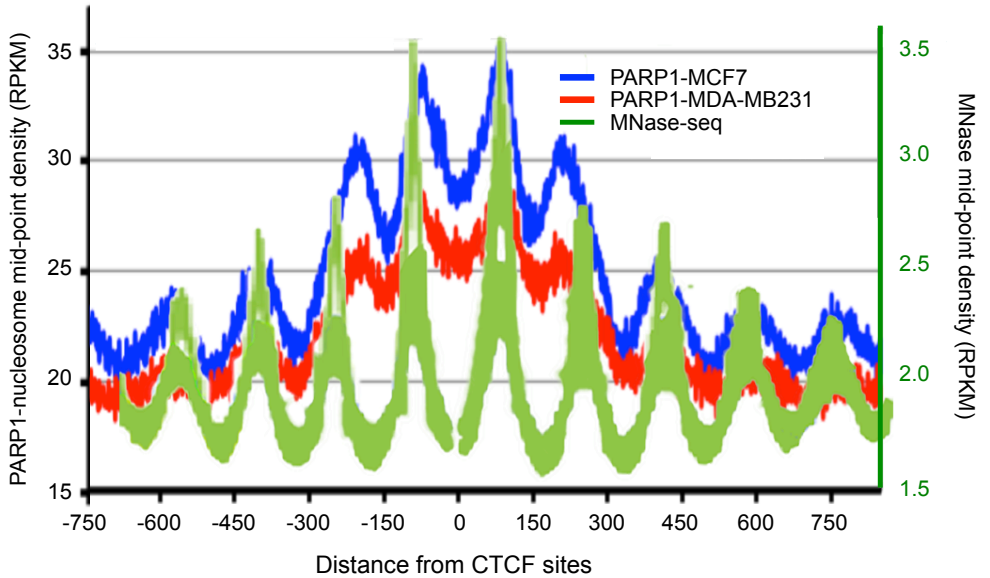

**C.**

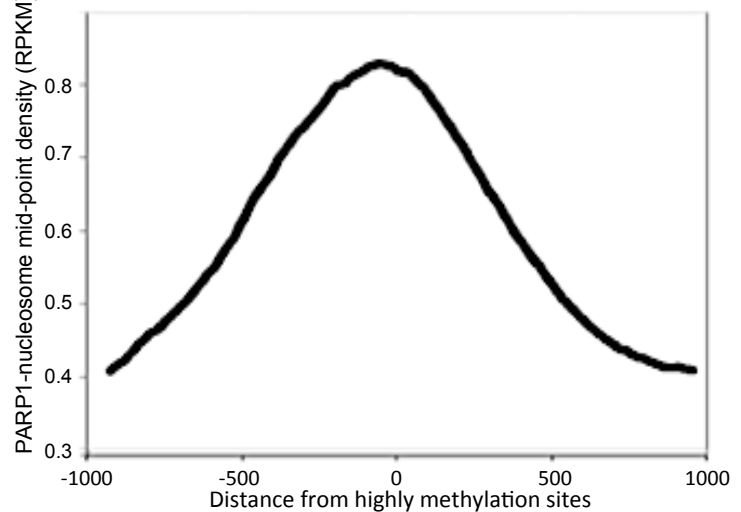

**Figure S9:** Comparison of MNase-seq data (total nucleosome positioning) with PARP1-bound nucleosomes at A) TSSs B) CTCF binding sites C) highly DNA methylated sites.
