# Supplementary material for: Genome-Wide Profiling of PARP1 Reveals an Interplay with Gene Regulatory Regions and DNA Methylation
Source: PubMed Central journal article supplement (PMC4549251; doi:10.1371/journal.pone.0135410), 2015-08-25
Supplement: pone.0135410.s011.pdf [file pone.0135410.s011.pdf]

**Table S1:** PARP1 correlations with different epigenetic regulators at transcription start site as well as genome-wide. For genome wide, the genome was tiled into 2 KB, and identical calculations as for the TSSs were done.

|                                                    | corr_value   | p_value       |
|----------------------------------------------------|--------------|---------------|
| <b>1. CTCF</b>                                     |              |               |
| <b>i) PARP1 vs CTCF at TSS</b>                     |              |               |
| ctcf_r1_v_parp1_mcf7                               | 0.11382852   | 5.126472e-12  |
| ctcf_r2_v_parp1_mcf7                               | 0.19594551   | 2.2392e-12    |
| ctcf_r1_v_parp1_mdamb231                           | 0.04467774   | 7.327472e-9   |
| ctcf_r2_v_parp1_mdamb231                           | 0.08303212   | 1.1311e-10    |
| <b>ii) PARP1 vs CTCF genome-wide</b>               |              |               |
| ctcf_r1_v_parp1_mcf7                               | 0.1854415    | 1.3333e-15    |
| ctcf_r2_v_parp1_mcf7                               | 0.2390277    | 2.1122e-15    |
| ctcf_r1_v_parp1_mdamb231                           | 0.1608382    | 1.93178e-13   |
| ctcf_r2_v_parp1_mdamb231                           | 0.1793969    | 1.327472e-12  |
| <b>2.Histone modifications</b>                     |              |               |
| <b>i) PARP1 vs Histone Marks at TSS</b>            |              |               |
| H3k9me3_v_parp1_mcf7                               | 0.2667278    | 1.444064e-15  |
| H3k27ac_v_parp1_mcf7                               | 0.3056719    | 1.018670e-09  |
| H3k27me3_v_parp1_mcf7                              | 0.3466788    | 2.174444e-13  |
| H3k36me3_v_parp1_mcf7                              | 0.3065474    | 1.451234e-08  |
| H3k4me3_r1_v_parp1_mcf7                            | 0.3869864    | 1.651546e-09  |
| H3k4me3_r2_v_parp1_mcf7                            | 0.3607083    | 2.211134e-12  |
| H3k9me3_v_parp1_mdamb231                           | 0.1674508    | 1.939051e-08  |
| H3k27ac_v_parp1_mdamb231                           | 0.1899501    | 7.041781e-18  |
| H3k27me3_v_parp1_mdamb231                          | 0.1133071    | 2.378452e-10  |
| H3k36me3_v_parp1_mdamb231                          | 0.2365975    | 5.312111e-13  |
| H3k4me3_r1_v_parp1_mdamb231                        | 0.3623120    | 4.614523e-18  |
| H3k4me3_r2_v_parp1_mdamb231                        | 0.3497517    | 8.111123e-15  |
| <b>ii) PARP1 vs Histone Marks genome-wide</b>      |              |               |
| H3k9me3_v_parp1_mcf7                               | 0.4098493    | 2.1038e-10    |
| H3k27ac_v_parp1_mcf7                               | 0.4011359    | 1.35210e-12   |
| H3k27me3_v_parp1_mcf7                              | 0.4200107    | 1.562347e-15  |
| H3k36me3_v_parp1_mcf7                              | 0.3882289    | 5.11112e-15   |
| H3k4me3_r1_v_parp1_mcf7                            | 0.1566817    | 7.123415e-08  |
| H3k4me3_r2_v_parp1_mcf7                            | 0.1180702    | 2.32211e-11   |
| H3k9me3_v_parp1_mdamb231                           | 0.2499175    | 1.158082e-149 |
| H3k27ac_v_parp1_mdamb231                           | 0.2573392    | 2.005263e-09  |
| H3k27me3_v_parp1_mdamb231                          | 0.1890674    | 2.758508e-174 |
| H3k36me3_v_parp1_mdamb231                          | 0.2859072    | 3.111123e-10  |
| H3k4me3_r1_v_parp1_mdamb231                        | 0.2524751    | 8.423001e-13  |
| H3k4me3_r2_v_parp1_mdamb231                        | 0.2344856    | 1.203512e-12  |
| <b>3. Methylation</b>                              |              |               |
| <b>i) PARP1 vs methylation status at TSS</b>       |              |               |
| methy1_r1_v_parp1_mcf7                             | 0.01473731   | 1.081047e-17  |
| methy1_r2_v_parp1_mcf7                             | 0.01549252   | 2.23332e-20   |
| methy1_r1_v_parp1_mdamb231                         | -0.102433957 | 1.00549e-16   |
| methy1_r2_v_parp1_mdamb231                         | -0.092442113 | 1.00009e-24   |
| <b>ii) PARP1 vs methylation status genome-wide</b> |              |               |
| methy1_r1_v_parp1_mcf7                             | 0.048287217  | 4.125970e-13  |
| methy1_r2_v_parp1_mcf7                             | 0.028169880  | 2.067856e-10  |
| methy1_r1_v_parp1_mdamb231                         | 0.017934524  | 1.149546e-09  |
| methy1_r2_v_parp1_mdamb231                         | 0.001891696  | 5.423150e-01  |
