# Supplementary material for: Genome-Wide Profiling of PARP1 Reveals an Interplay with Gene Regulatory Regions and DNA Methylation
Source: PubMed Central journal article supplement (PMC4549251; doi:10.1371/journal.pone.0135410), 2015-08-25
Supplement: pone.0135410.s012.pdf [file pone.0135410.s012.pdf]

**Table S2: HYPERMETHYLATED GENES AND GENOMIC REGIONS MEDIATED BY PARYLATION INHIBITION**

| <b>GENE BODY</b> |           |           |           |              |              |
|------------------|-----------|-----------|-----------|--------------|--------------|
| ABCA7            | AES       | AFF1      | API5      | ARPC3        | ASGR1        |
| ATRN             | B3GAT3    | BAZ2A     | BBS4      | BTBD8        | C13orf38     |
| C20orf114        | C20orf20  | C20orf95  | C21orf66  | C4orf32      | C7orf28A     |
| CACNA2D1         | CACNB1    | CAMTA1    | CASP12    | CCDC138      | CCDC24       |
| CERKL            | CNPY3     | CYP39A1   | DACT1     | DEAF1        | DUSP12       |
| EDIL3            | EFCAB5    | ERGIC3    | ERICH1    | EVI5         | EXPH5        |
| FAM45B           | FDFT1     | FLJ35220  | GAA       | GABBR1       | GAS7         |
| GFOD1            | GLYR1     | GRIA4     | GRID2IP   | GRK5         | GUCY2G       |
| H2AFZ            | HCN1      | HSPA12A   | HSPA8     | KCNJ9        | KHDRBS2      |
| KIF13B           | KLF13     | KLHL1     | KPNA6     | LOC100133612 | LOC100134368 |
| LOC100302652     | LOC344967 | LOC399815 | LOC440839 | LOC642846    | LOC642846    |
| LOC729082        | LONRF2    | MAN2A1    | MCF2L     | MDN1         | MKX          |
| MMP17            | MPL       | MTA3      | MYO10     | NAA16        | NCRNA00085   |
| NTN1             | OPCML     | OR7E5P    | OR8U8     | ORC6L        | PAK1IP1      |
| PAPSS1           | PDCD5     | PDXDC2    | PICALM    | PINK1        | PITPNB       |
| PLAU             | PLAUR     | PLK1      | PRX       | PTPRD        | RABGAP1L     |
| RNF166           | RNPEP     | ROR1      | RPLP1     | RPS24        | SARNP        |
| SCFD2            | SGCD      | SLC25A38  | SNHG1     | SORL1        | SPNS2        |
| TCF25            | TEPP      | THBS4     | TLE2      | TMCO6        | TMEM167A     |
| TMEM87B          | TRIM31    | TRIP10    | UBR3      | UNC5D        | USP22        |
| VGLL4            | WDFY2     | WDR60     | ZFAND1    | ZFYVE28      | ZNF214       |
| ZNF511           |           |           |           |              |              |

| <b>PROMOTER</b> |          |          |           |           |          |
|-----------------|----------|----------|-----------|-----------|----------|
| AASDHPPT        | ABHD4    | ABLIM2   | ACAD10    | ACADSB    | ACAP3    |
| ACAT2           | ACBD5    | ACIN1    | ACTG1     | ACTR6     | ADAM32   |
| ADD3            | ADRBK1   | AFG3L1   | AGPHD1    | AHI1      | AK2      |
| AK5             | AKAP13   | AKR1A1   | AKTIP     | ALG9      | ALMS1    |
| AMPH            | ANG      | ANKMY1   | ANKRD34B  | ANP32A    | ANXA3    |
| AP1S3           | AP2M1    | APAF1    | APBA3     | APBB3     | APOL2    |
| ARHGAP28        | ARL1     | ARL5A    | ARSA      | ARSK      | ASB3     |
| ASNSD1          | ASPA     | ATAD1    | ATHL1     | ATN1      | ATP10D   |
| ATP5I           | ATP6V0A1 | ATP6V1G2 | AURKB     | BAT4      | BDH1     |
| BMS1            | BNIP2    | BPNT1    | BRAP      | BRD2      | BTBD18   |
| BTF3L4          | BTRC     | C10orf55 | C12orf11  | C12orf32  | C12orf65 |
| C14orf119       | C15orf40 | C15orf42 | C15orf63  | C17orf100 | C18orf19 |
| C18orf54        | C19orf62 | C1orf151 | C1orf174  | C1orf182  | C1orf212 |
| C1orf31         | C1orf43  | C1orf85  | C20orf111 | C20orf20  | C21orf45 |
| C21orf49        | C22orf32 | C2orf47  | C2orf67   | C4orf46   | C6orf114 |
| C6orf126        | C6orf52  | C8orf40  | C8orf59   | CABYR     | CALB2    |
| CALU            | CAMTA2   | CANX     | CAPS2     | CBFB      | CBLB     |
| CBLN2           | CBR4     | CBR4     | CBY1      | CCAR1     | CCDC159  |
| CCDC92          | CCT3     | CD320    | CDC20     | CDC27     | CDC42    |
| CDC7            | CDK12    | CDKN1C   | CENPBD1   | CEP290    | CHAC2    |
| CHEK1           | CHORDC1  | CIZ1     | CLIC5     | CLPB      | CMTM4    |
| CNNM2           | CNP      | COG3     | COPB1     | CPSF6     | CSNK2B   |
| CSTF3           | CTDSPL2  | CTU2     | CWF19L1   | CYB5RL    | CYBASC3  |
| DBP             | DBR1     | DCAF10   | DCBLD2    | DCUN1D2   | DDA1     |
| DDB1            | DDX17    | DDX24    | DEK       | DEM1      | DFFA     |

|           |           |            |           |              |              |
|-----------|-----------|------------|-----------|--------------|--------------|
| DFFB      | DHCR7     | DHDDS      | DHRS12    | DHX15        | DHX37        |
| DMC1      | DNAH14    | DNAH3      | DNAH6     | DNAJC21      | DNAJC3       |
| DNAJC5B   | DNAJC8    | DPEP2      | DPYSL4    | DSE          | DUT          |
| EED       | EEF1A1    | EEF1E1     | EFEMP2    | EFHC1        | EIF4A1       |
| ELP2P     | ENKUR     | EPHX1      | EPRS      | ERCC2        | ERCC5        |
| ERGIC2    | ERO1LB    | ESR1       | ETFDH     | ETS1         | ETV3         |
| ETV4      | EXO1      | EXOSC9     | FAM126A   | FAM149B1     | FAM160B1     |
| FAM24B    | FAM43A    | FAM46A     | FAM49B    | FANCI        | FARSB        |
| FBXO2     | FBXO4     | FBXO44     | FBXO47    | FBXO8        | FCER1A       |
| FDXR      | FGFR1OP2  | FLJ41603   | FLJ44606  | FMNL2        | FOXM1        |
| FOXP1     | FRS3      | FUZ        | GABRB3    | GALNT7       | GARS         |
| GATA2     | GEMIN4    | GFER       | GJD3      | GLMN         | GLRA3        |
| GMIP      | GNB4      | GNG12      | GNG5      | GNG7         | GNPNAT1      |
| GORASP1   | GPR108    | GPR176     | GPR19     | GPR4         | GPR63        |
| GTPBP10   | GUSBL2    | H2AFV      | HCG4P6    | HDAC5        | HIF1AN       |
| HIGD1A    | HIGD2B    | HIST1H1E   | HIST1H2AD | HIST1H2AG    | HIST1H2BE    |
| HIST1H2BF | HIST1H2BL | HIST1H3D   | HIST1H3H  | HIST1H4E     | HMBOX1       |
| HMGB2     | HMMR      | HN1        | HNRNPL    | HOXC8        | HSP90AB1     |
| HYLS1     | ICA1L     | IDE        | IFITM1    | IFT122       | IFT88        |
| IGSF8     | IKZF2     | IKZF5      | ING4      | INTS9        | IRS1         |
| ISG15     | JARID2    | KBTBD3     | KCTD20    | KCTD7        | KDSR         |
| KIAA0562  | KIAA0753  | KIAA1012   | KIAA1522  | KIAA1712     | KIAA1715     |
| KIAA1826  | KIFC1     | KPNB1      | KRTAP20-3 | LCA5         | LDLR         |
| LENG9     | LEPR      | LIMD1      | LIN54     | LOC100190939 | LOC100294362 |
| LOC143666 | LOC256880 | LOC284900  | LOC348926 | LOC552889    | LOC646851    |
| LOC728407 | LOC729384 | LPGAT1     | LRIG2     | M6PR         | MALT1        |
| MALT1     | MAP3K3    | MAP3K5     | MAP3K7    | MAPK1        | MAPK15       |
| MAPK7     | MAPKAPK3  | MBD4       | MBLAC1    | MCCC2        | MCM10        |
| MCM3      | MED15     | MED19      | MED28     | MED31        | METT10D      |
| METTL11A  | METTL14   | METTL2B    | MIA3      | MIF          | MIR760       |
| MLF1IP    | MLPH      | MOGS       | MOSPD3    | MPHOSPH8     | MRAS         |
| MRPL20    | MRPL37    | MRPL54     | MRPS10    | MRPS14       | MRPS14       |
| MRPS18B   | MS4A6E    | MSX2       | MT2A      | MTERF        | MTMR7        |
| MTRF1     | MUL1      | MYADM      | MYCL1     | MYL6         | MYO1B        |
| N4BP2     | NAA20     | NAA38      | NACA      | NAP1L1       | NAT9         |
| NBAS      | NCOA5     | NCRNA00171 | NDUFB4    | NDUFS5       | NEAT1        |
| NFIL3     | NFKBIL1   | NGDN       | NHEDC1    | NIF3L1       | NIF3L1       |
| NIPBL     | NOL12     | NPAS3      | NRBF2     | NRG4         | NT5C         |
| NTS       | NUDCD2    | NUDCD3     | NUDT12    | NUDT15       | NUP35        |
| OCIAD1    | OPN5      | OR10S1     | OR12D2    | OR12D3       | OR4A16       |
| OR51S1    | OR52B4    | OR5B12     | OR5B3     | OR5L2        | OR5M1        |
| OR8J1     | ORMDL2    | OSGIN2     | OXGR1     | P4HA2        | PAPD4        |
| PARG      | PARP4     | PCDHB16    | PCOTH     | PDGFRA       | PEX10        |
| PEX11G    | PFKFB2    | PGAM1      | PGR       | PHACTR4      | PHF10        |
| PHIP      | PI4K2B    | PIGU       | PIK3R4    | PLEKHG3      | PMF1         |
| PMVK      | PNRC2     | POLD1      | POLD3     | POLDIP3      | POU2F1       |
| PPAP2A    | PPAP2A    | PPP1R10    | PPP1R15B  | PPP2R3A      | PRICKLE4     |
| PRKCG     | PRR11     | PRR3       | PSMB2     | PTCHD2       | PTGER1       |
| PTGER3    | PTGR2     | PUSL1      | PVRL3     | PXT1         | RAB36        |
| RAB6A     | RAD51AP2  | RAD51L1    | RAP1GAP   | RASSF3       | RB1          |
| RBM33     | RBM39     | RBM47      | RBP7      | RGL2         | RHOA         |
| RHOT1     | RIMKLA    | RIMS3      | RNASE4    | RNF138P1     | RNF150       |
| RNF44     | RNLS      | RNMT       | RNU11     | ROBO2        | RPA1         |

|         |          |           |         |          |         |
|---------|----------|-----------|---------|----------|---------|
| RPAP2   | RPL13A   | RPL13AP5  | RPL18A  | RPL18AP3 | RPL41   |
| RPN2    | RPP14    | RPS26     | RPS7    | RPS8     | RPSA    |
| RRBP1   | RSPH4A   | S1PR1     | SCN8A   | SDAD1    | SDHD    |
| SEC1    | SEC11C   | SELO      | SEMA4B  | SERINC4  | SERINC5 |
| SFPQ    | SFRP4    | SFRS11    | SFRS2IP | SH3BP4   | SH3BP5  |
| SIRT7   | SKA2     | SLC15A4   | SLC20A2 | SLC30A5  | SLC33A1 |
| SLC3A2  | SLC48A1  | SLC8A3    | SLIT1   | SLU7     | SMAGP   |
| SMEK2   | SMTNL2   | SMYD4     | SNORA6  | SNORD26  | SNORD27 |
| SNORD28 | SNORD29  | SNORD46   | SNORD55 | SNX10    | SNX19   |
| SNX3    | SNX8     | SPG7      | SPOP    | SPTY2D1  | SRBD1   |
| SRCAP   | SRM      | SSBP4     | SSH3    | ST8SIA1  | STOX2   |
| STX5    | STX6     | SVIP      | SYT17   | TAF5     | TANC1   |
| TAOK3   | TAX1BP1  | TBC1D1    | TCF3    | TCF7L2   | TCP11L2 |
| TES     | TFPI2    | TGFBR2    | THG1L   | THNSL1   | THOC5   |
| TIMM8B  | TLE6     | TLR5      | TLR6    | TMEM104  | TMEM159 |
| TMEM19  | TMEM205  | TMEM223   | TMEM52  | TMEM56   | TMEM8A  |
| TMTC3   | TMX2     | TNFRSF11A | TOMM7   | TOP3B    | TPT1    |
| TRIM24  | TRIM5    | TRMU      | TSKU    | TSPAN17  | TSPYL1  |
| TSSC4   | TTC18    | TTC37     | TTLL6   | TUBGCP2  | TWF1    |
| TWSG1   | TXN2     | TXNDC12   | TXNDC17 | TXNL1    | UBA2    |
| UBAP2L  | UBE3A    | UBN1      | UCHL3   | UNC13D   | UNG     |
| UQCRFS1 | USP39    | USP6NL    | UTP20   | VASP     | VPS25   |
| VPS35   | VTRNA1-2 | WAPAL     | WDTC1   | WDYHV1   | XRCC2   |
| XRCC4   | YPEL2    | ZBTB48    | ZBTB7A  | ZFAND6   | ZFP91   |
| ZKSCAN5 | ZMYM6    | ZNF137    | ZNF140  | ZNF17    | ZNF195  |
| ZNF215  | ZNF227   | ZNF333    | ZNF398  | ZNF425   | ZNF507  |
| ZNF514  | ZNF519   | ZNF557    | ZNF562  | ZNF600   | ZNF643  |
| ZNF664  | ZNF668   | ZNF680    | ZNF695  | ZNF703   | ZNRD1   |
| ZSWIM2  | ZSWIM5   | ZZZ3      | IKBIP   | LEPROT   | TTC21A  |

|                                    |          |           |          |          |          |
|------------------------------------|----------|-----------|----------|----------|----------|
| <b>BOTH PROMOTER AND GENE BODY</b> |          |           |          |          |          |
| BLOC1S2                            | C11orf73 | C20orf132 | C2orf60  | C6orf217 | CASC3    |
| CLK1                               | DCTN4    | ECD       | GNL1     | GPC5     | KCNQ1OT1 |
| LOC729991-MEF2B                    | LYSMD2   | MCFD2     | MIPEP    | MLF2     | MYO1E    |
| NEDD9                              | NME2     | PBX3      | PDE4C    | PDLIM5   | PEX19    |
| PSMA1                              | RCOR3    | RGMB      | SP3      | TBC1D14  | TMCO3    |
| TMEM138                            | TNRC6B   | TUBA4A    | UGP2     | USP2     | ANGPT1   |
| <b>UTR</b>                         |          |           |          |          |          |
| ANGPT1                             | BAD      | BEND6     | C17orf99 | C1orf187 | DGKH     |
| GABRA44                            | SHOX2    | STATH     | UPK3B    | ZNF470   |          |
| <b>PROMOTER AND UTR</b>            |          |           |          |          |          |
| TAPBP                              | CASP4    |           |          |          |          |
|                                    |          |           |          |          |          |
|                                    |          |           |          |          |          |
