# Supplementary material for: Genome-Wide Profiling of PARP1 Reveals an Interplay with Gene Regulatory Regions and DNA Methylation
Source: PubMed Central journal article supplement (PMC4549251; doi:10.1371/journal.pone.0135410), 2015-08-25
Supplement: pone.0135410.s013.pdf [file pone.0135410.s013.pdf]

**Table S3: HYPOMETHYLATED GENES AND GENOMIC REGIONS MEDIATED BY PARYLATION INHIBITION**

| <b>GENE BODY</b> |            |          |                    |              |           |
|------------------|------------|----------|--------------------|--------------|-----------|
| AASDHPPT         | ACADVL     | ALK      | BAT5               | C1orf107     | C7orf50   |
| CAMTA1           | CCDC64B    | CKS1B    | CREG1              | FAM120AOS    | FGF12     |
| FTO              | GABRB3     | GNL1     | GPR125             | GPR98        | HES2      |
| HSD17B7P2        | KIAA0319   | KIAA1609 | LOC285456          | LOC439994    | LRTOMT    |
| MATN1            | MED20      | MED8     | MINPP1             | MOV10        | MTHFS     |
| MTX1             | MYB        | NAA38    | NCRNA00171         | NFIC         | NOX4      |
| NTM              | PAR5       | PCDHA1   | PCDHA2             | PCDHA3       | PCDHA4    |
| PCDHA5           | PER4       | PEX14    | PLXNA2             | PMS2L1       | PTHLH     |
| RBM22            | RING1      | RPS18    | SERINC2            | SHFM1        | SLC25A46  |
| SNORD64          | SNRPC      | SPDYA    | SRRM3              | SSH3         | SUZ12P    |
| TCERG1L          | TMEM132D   | TMEM41B  | TPD52              | TRIM27       | TRIM69    |
| TRIM77           | TTC4       | VIM      | YME1L1             |              |           |
| <b>PROMOTER</b>  |            |          |                    |              |           |
| ABHD13           | ADAT2      | ADD3     | ADSL               | ALDOC        | AMOTL1    |
| AP2B1            | ARHGAP1    | ARNTL    | ART5               | B4GALNT1     | B9D2      |
| BACH1            | BCAR3      | BCO2     | BIRC3              | BMPR1A       | BYSL      |
| C10orf131        | C10orf71   | C11orf31 | C11orf46           | C11orf59     | C11orf83  |
| C13orf36         | C18orf10   | C18orf55 | C19orf47           | C19orf56     | C1orf84   |
| C2orf69          | C5orf30    | C7orf64  | CA8                | CACNA1D      | CACNA1G   |
| CCDC109A         | CCL11      | CD164L2  | CDC23              | CDC42EP3     | CDC45L    |
| CHST11           | CHTF18     | CLDN22   | CNST               | COL4A3BP     | COX16     |
| CPNE5            | CRYM       | CSTF3    | DCPS               | DCTD         | DDHD2     |
| DERL2            | DLG4       | DLGAP2   | DNAJC8             | DPH3         | DYNC1I2   |
| EDC3             | EFNA4      | EIF2B1   | EIF4A2             | EPRS         | ERBB2     |
| ERLIN2           | ERO1L      | ESR1     | FAM111A            | FAM120A      | FAM82A2   |
| FAM86A           | FANCF      | FANCF    | FARP2              | FASTKD5      | FBXO15    |
| FGF14            | FGFBP3     | FLJ10661 | FLJ32065           | FOXJ3        | GABRA4    |
| GAK              | GLYCTK     | GPC6     | GPD1L              | GPD2         | GPFR      |
| GPR157           | GSTCD      | GTF2H3   | GTPBP10            | HIF1AN       | HINT3     |
| HIST1H2AC        | HIST1H2BF  | HIST1H3D | HLA-C              | HOMEZ        | HSD17B12  |
| INTS1            | IQUB       | ITCH     | ITSN1_ITSN1_CRYZL1 | JAZF1        | KCNJ8     |
| KIF2C            | KLC4       | KLKB1    | KTN1               | LEPROT       | LHX1      |
| LIG4             | LIPT1      | LMBRD2   | LOC100286844       | LOC100286844 | LOC143666 |
| LOC728190        | MAP9       | MASTL    | MIS12              | MOSC2        | MRPL2     |
| MRRF             | MTERFD3    | MTIF3    | NAF1               | NANP         | NBR1      |
| NCKAP5L          | NCRNA00169 | NDUFA11  | NEIL2              | NEU1         | NHEDC1    |
| NOL9             | NUMB       | NUS1     | OR2G3              | OR4A15       | OR51A2    |
| OR6P1            | OR8H1      | OSCP1    | OXNAD1             | PAFAH1B3     | PAIP2     |
| PAK1IP1          | PARP1      | PCBP2    | PCDHA6             | PCF11        | PDE8A     |
| PDLIM5           | PER3       | PEX1     | PEX3               | PHRF1        | PIGK      |
| PIK3C3           | PIK3R2     | PILRB    | PLA2G12A           | PLA2G6       | PLD3      |
| PMM1             | POLK       | POLR3A   | PPP1R10            | PPP1R3C      | PRIC285   |
| PRKAA2           | PRR3       | PTMS     | PYHIN1             | RAB30        | RAB39     |
| RALGAPA1         | RARA       | RARA     | RBBP8              | RBM18        | RFWD3     |
| RIC8B            | RNF219     | RPGRIP1L | RPL34              | RPUSD1       | RUFY1     |

|                               |         |          |          |          |          |
|-------------------------------|---------|----------|----------|----------|----------|
| RWDD1                         | SAP130  | SCLY     | SCRN2    | SEC24D   | SEMA5A   |
| SERPINB4                      | SF3A3   | SHC1     | SKP2     | SLC16A13 | SLC22A23 |
| SLC22A5                       | SLC2A1  | SMAD4    | SNRNP40  | SPATA13  | SRRT     |
| STIM2                         | SUPT5H  | SVIP     | TAS1R1   | TBC1D15  | TBL1XR1  |
| TFB2M                         | THBS1   | THBS3    | TIMM17A  | TIMM22   | TLE1     |
| TMEM175                       | TMEM91  | TNFRSF19 | TRAM1L1  | TRPS1    | TSGA10   |
| TUBA1B                        | UBL5    | UBOX5    | UFD1L    | UGP2     | USP48    |
| VPS52                         | WDR19   | YARS2    | ZC3H13   | ZCCHC17  | ZNF230   |
| ZNF251                        | ZNF259  | ZNF317   | ZNF350   | ZNF408   | ZNF684   |
| ZNF697                        | ZNF74   | ZNRD1    | ZZZ3     |          |          |
| <b>PROMOTER AND GENE BODY</b> |         |          |          |          |          |
| SEPT9                         | C6orf52 | FNDC3A   | KIAA1328 | MOCS2    | MORG1    |
| <b>PROMOTER AND UTR</b>       |         |          |          |          |          |
| NLE1                          | PDE4C   | PRDM2    | TNFAIP8  | ZNF323   | CARD18   |
| HIST1H2AD                     | LGI4    | NPR3     | PSMG4    |          |          |
