# Supplementary material for: Genome-Wide Profiling of PARP1 Reveals an Interplay with Gene Regulatory Regions and DNA Methylation
Source: PubMed Central journal article supplement (PMC4549251; doi:10.1371/journal.pone.0135410), 2015-08-25
Supplement: pone.0135410.s014.pdf [file pone.0135410.s014.pdf]

Table S4: Pathways of gene targeted by PARylation-mediated methylation

**Hypomethylation:**

| <b>A. Pathway commons analyses</b>          |              |
|---------------------------------------------|--------------|
| PathwayName                                 | Statistics   |
| Gene Expression                             | P = 5.41e-06 |
| Developmental Biology                       | P = 9.49e-05 |
| NOTCH                                       | P = 0.0003   |
| Notch signaling pathway                     | P = 0.0003   |
| Notch-mediated HES/HEY network              | P = 0.0003   |
| mRNA Processing                             | P = 0.0009   |
| Axon guidance                               | P = 0.0013   |
| Formation and Maturation of mRNA Transcript | P = 0.0022   |
| ErbB4 signaling events                      | P = 0.0026   |
| mRNA Splicing - Major Pathway               | P = 0.0027   |

| <b>B. KEGG pathway analyses</b> |            |
|---------------------------------|------------|
| PathwayName                     | Statistics |
| Metabolic pathways              | P = 0.0021 |
| Pathways in cancer              | P = 0.0043 |
| Phagosome                       | P = 0.0229 |
| Glycerophospholipid metabolism  | P = 0.0275 |
| Focal adhesion                  | P = 0.0275 |
| Ether lipid metabolism          | P = 0.0275 |
| TGF-beta signaling pathway      | P = 0.0275 |
| Small cell lung cancer          | P = 0.0275 |
| Ubiquitin mediated proteolysis  | P = 0.0275 |
| Spliceosome                     | P = 0.0275 |

**Hypermethylated:**

| <b>A. Pathway commons analyses</b>                                     |              |
|------------------------------------------------------------------------|--------------|
| PathwayName                                                            | Statistics   |
| LKB1 signaling events                                                  | P = 1.79e-09 |
| Signaling events mediated by focal adhesion kinase                     | P = 1.79e-09 |
| VEGF and VEGFR signaling network                                       | P = 1.79e-09 |
| TRAIL signaling pathway                                                | P = 1.79e-09 |
| ErbB receptor signaling network                                        | P = 1.79e-09 |
| Arf6 trafficking events                                                | P = 1.79e-09 |
| Urokinase-type plasminogen activator (uPA) and uPAR-mediated signaling | P = 1.79e-09 |
| Signaling events mediated by Hepatocyte Growth Factor Receptor (c-Met) | P = 1.79e-09 |
| Sphingosine 1-phosphate (S1P) pathway                                  | P = 1.79e-09 |
| mTOR signaling pathway                                                 | P = 1.79e-09 |

| <b>B. KEGG pathways</b>                     |            |
|---------------------------------------------|------------|
| PathwayName                                 | Statistics |
| Metabolic pathways                          | P = 0.0001 |
| Adherens junction                           | P = 0.0004 |
| MAPK signaling pathway                      | P = 0.001  |
| Protein processing in endoplasmic reticulum | P = 0.001  |
| Ribosome                                    | P = 0.001  |
| Nucleotide excision repair                  | P = 0.0017 |
| Homologous recombination                    | P = 0.0017 |
| Systemic lupus erythematosus                | P = 0.0017 |
| Endocytosis                                 | P = 0.003  |
| Fc gamma R-mediated phagocytosis            | P = 0.0037 |
