# Supplementary material for: Genome-Wide Profiling of PARP1 Reveals an Interplay with Gene Regulatory Regions and DNA Methylation
Source: PubMed Central journal article supplement (PMC4549251; doi:10.1371/journal.pone.0135410), 2015-08-25
Supplement: pone.0135410.s015.pdf [file pone.0135410.s015.pdf]

**Table S5: GENES THAT ARE BOTH HYPER- AND HYPOMETHYLATED BY PARylation and the genomic regions affected.**

|          |         |           |          |        |            |         |
|----------|---------|-----------|----------|--------|------------|---------|
| CAMTA1   | PAK1IP1 | HIST1H2AD | LOC14366 | ZZR3   | NCRNA00171 | UGP2    |
| AASDHPPT | ADD3    | PDE4C     | NHEDC    | LEPROT | DNAJC8     | GABRA4  |
| GABRB3   | C6orf52 | GTPBP10   | PPP1R10  | GNL    | HIST1H2BF  | ZNRD1   |
| NAA38    | CSTF3   | HIF1AN    | PRR3     | PDLIM5 | SVIP       | HISTH3D |
| SSH3     | EPRS    |           |          |        |            |         |

Genes with regions undergoing hypo and hypermethylated in different genic regions.

|           | HYPOMETHYLATED REGION | HYPERMETHYLATED REGION |
|-----------|-----------------------|------------------------|
| PAK1P1    | Promoter              | Gene body              |
| AASDHPPT  | Gene body             | Promoter               |
| C6orf52   | Gene body             | promoter               |
| GABRB3    | Gene body             | Promoter               |
| HIST1H2AD | 3'UTR                 | Promoter               |
| NAA38     | Gene body             | Promoter               |
| NCRNA0071 | Gene body             | Promoter               |
| SSH3      | Gene body             | Promoter               |
| GNL       | Promoter              | Gene body              |
| PDLIMS    | Promoter              | Gene body              |
| UGP2      | Promoter              | Gene body              |
| GABRA4    | Promoter              | 3'UTR                  |
